# Supplementary material for: Repetitive transcranial magnetic stimulation (rTMS) in autism spectrum disorder: protocol for a multicentre randomised controlled clinical trial
Source: PubMed Central journal article supplement — BMJ Open. 2021 Jul 7;11(7):e046830. doi: 10.1136/bmjopen-2020-046830 (PMC8264904; doi:10.1136/bmjopen-2020-046830), 2021-07-07
Supplement: bmjopen-2020-046830supp001.pdf [file bmjopen-2020-046830supp001.pdf]

## BIOLOGICAL SPECIMENS

Participants will be administered a buccal swab on two occasions, which involves rubbing a cotton bud against the inside of the cheek. These will be collected in person by a member of the research team at each site. Specimens will then be sealed in a DNA/RNA Shield tube and labelled with the participant's unique study identification code. It will then be transported by courier/post to the Institute of Molecular Bioscience, University of Queensland, for extraction, storage, and analysis.

Numerical data arising from genetic and epigenetic analyses will be sent electronically to the research team (Chief Investigators Prof. Enticott and Prof. Middeldorp) and stored in REDCap databases. PDF files containing results will also be stored in REDCap.

The research team will retain all biospecimens, which will be securely stored at the Institute of Molecular Bioscience, University of Queensland. This will allow the possibility of future analyses, particularly to determine genetic and epigenetic factors associated with a clinical response to the TBS intervention. The research team may contribute results from these data to future collaborative projects, which may involve external researchers who are not involved in the current trial. No information that could identify a participant will be shared. Participants (and their parent/guardian where necessary) will be asked to provide permission for future biospecimen use as part of the informed consent procedure.
